# Supplementary material for: Direct solid sample analysis of low-cost jewelry using spectroanalytical techniques: exploratory chemical data evaluation and metal migration with synthetic sweat
Source: Royal Society of Chemistry journal article supplement (doi:10.1039/d4ay00325j), 2024-01-01
Supplement: d4ay00325j1.pdf [file d4ay00325j1.pdf]

## **Direct solid sample analysis of low-cost jewelry using spectroanalytical techniques: exploratory chemical data evaluation and metals migration with synthetic sweat**

Thaila Lorena de Araújo<sup>a</sup>, Fabiola Manhas Verbi Pereira<sup>b</sup> and Edenir Rodrigues Pereira-Filho<sup>a\*</sup>

<sup>a</sup>*Group of Applied Instrumental Analysis, Chemistry Department, Federal University of São Carlos, 13565-905 São Carlos, São Paulo State, Brazil.*

<sup>b</sup>*Group of Alternative Analytical Approaches (GAAA), Bioenergy Research Institute (IPBEN), Institute of Chemistry, São Paulo State University (UNESP), Araraquara, São Paulo 14800-060, Brazil.*

*\*Corresponding author: Edenir R. Pereira-Filho (erpf@ufscar.br)*

Supplementary material

Fig 1SM: Sample S1 image before and after LIBS data acquisition (see red dotted rectangle). LIBS emission spectrum (right and upper part) and XRF fluorescence spectrum (right and below part). Both data were recorded in the same surface region.

Before LIBS data acquisition.

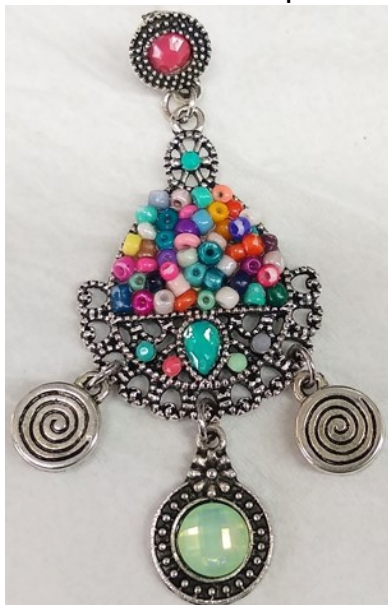

LIBS emission spectrum

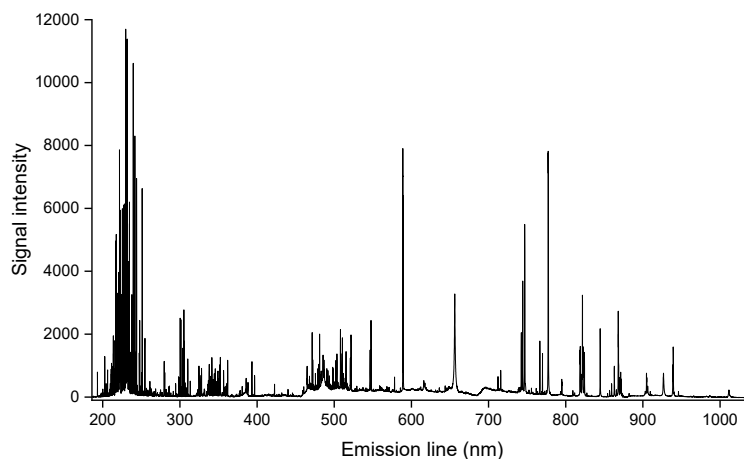

After LIBS data acquisition in the rear part of the sample.

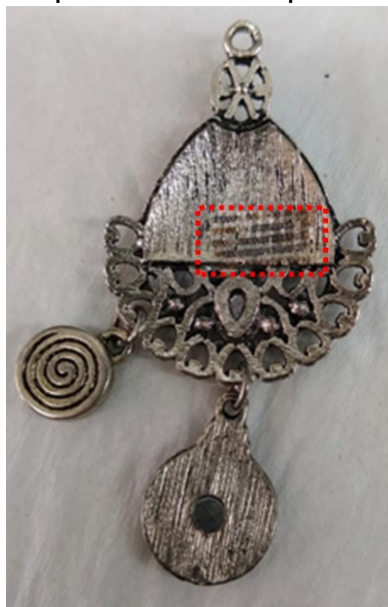

XRF spectrum

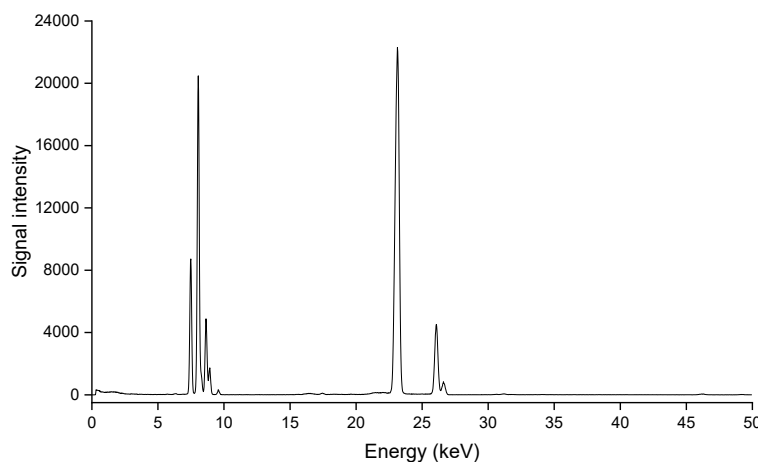

Fig 2SM: Sample S2 image before and after LIBS data acquisition (see red dotted rectangle). LIBS emission spectrum (right and upper part) and XRF fluorescence spectrum (right and below part). Both data were recorded in the same surface region.

LIBS emission spectrum

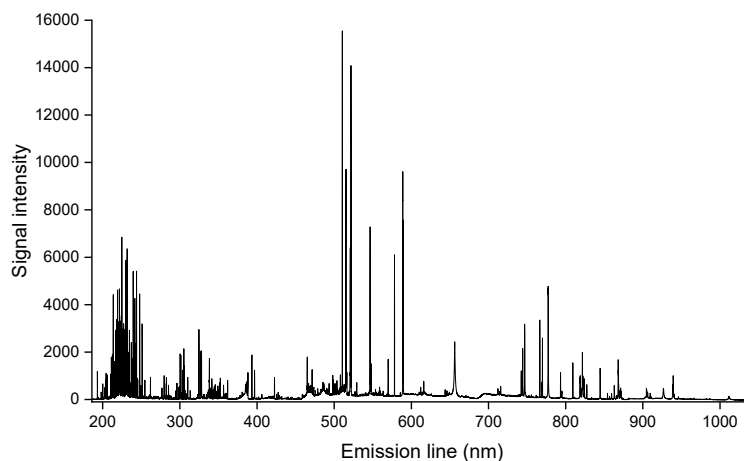

Before LIBS data acquisition

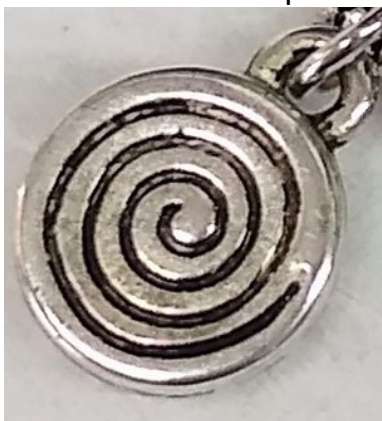

After LIBS data acquisition

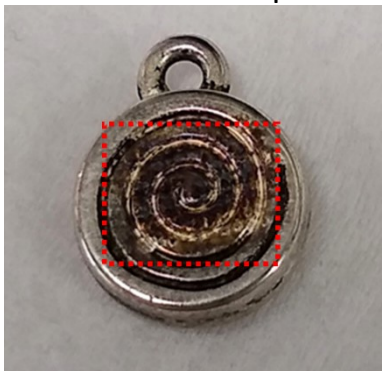

XRF spectrum

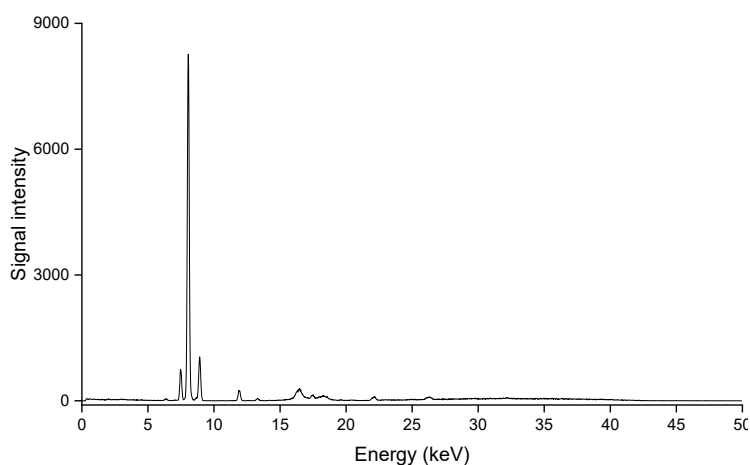

Fig 3SM: Sample S3 image before and after LIBS data acquisition (see red dotted rectangle). LIBS emission spectrum (right and upper part) and XRF fluorescence spectrum (right and below part). Both data were recorded in the same surface region.

LIBS emission spectrum

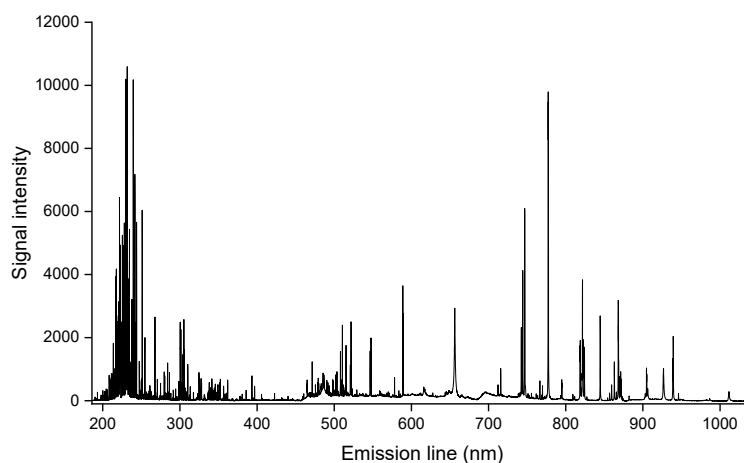

Before LIBS data acquisition

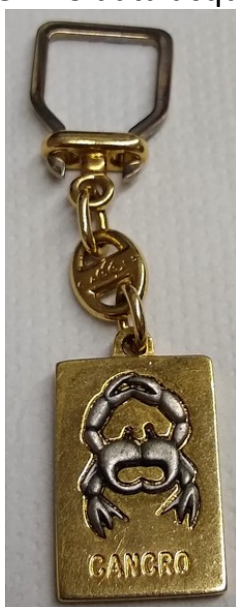

XRF spectrum

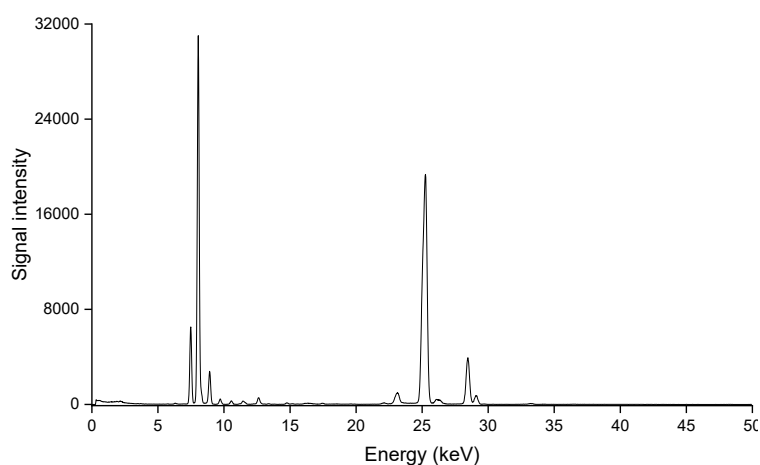

After LIBS data acquisition (The sample was analyzed twice using LIBS, to optimize the region of the data acquisition.)

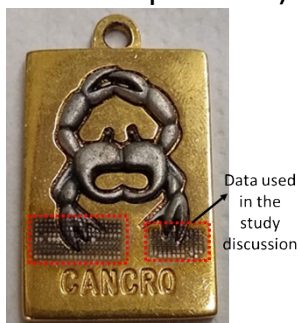

Fig 4SM: Sample S4 image before and after LIBS data acquisition (see red dotted rectangle). LIBS emission spectrum (right and upper part) and XRF fluorescence spectrum (right and below part). Both data were recorded in the same surface region.

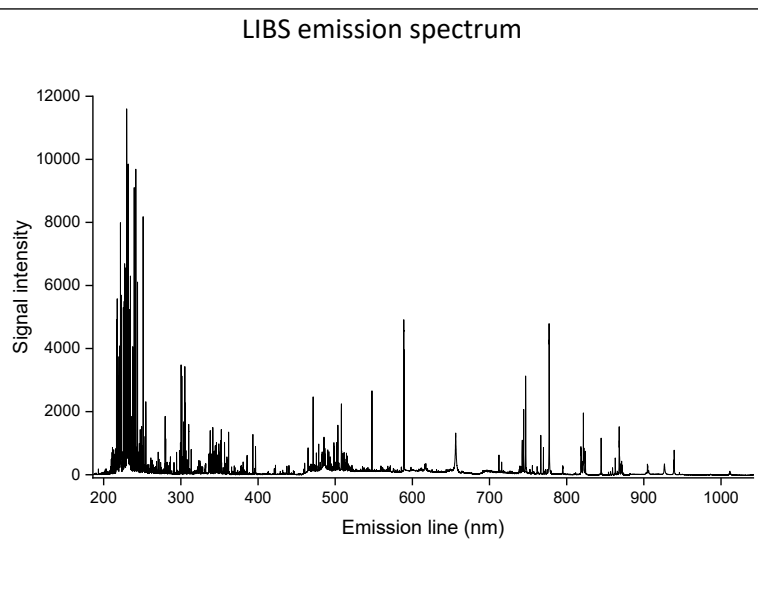

Before LIBS data acquisition

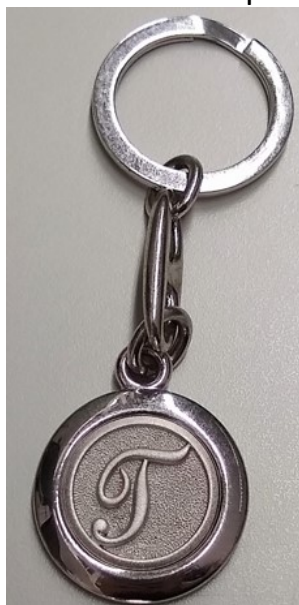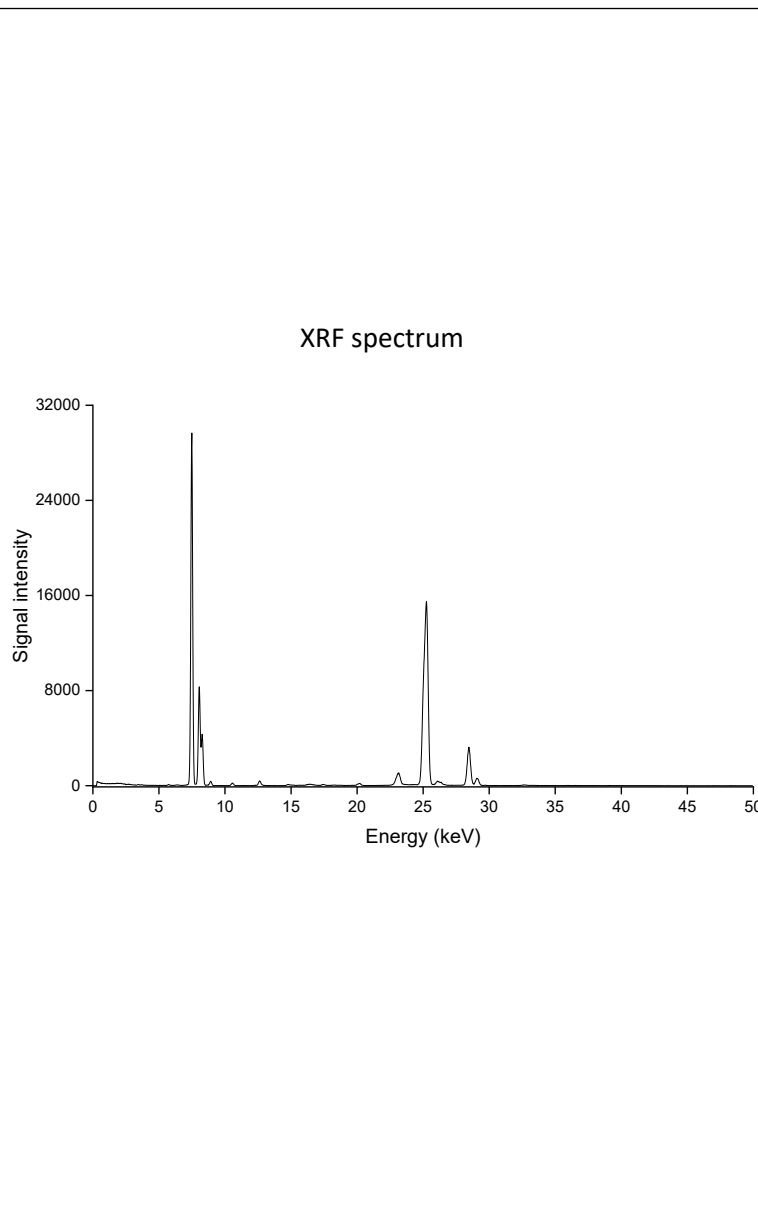

After LIBS data acquisition (The sample was analyzed twice using LIBS, to optimize the region of the data acquisition.)

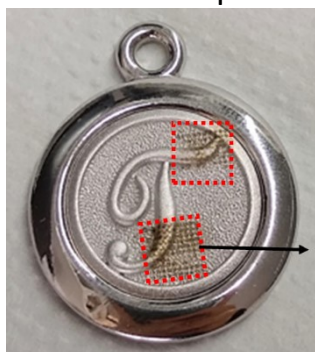

Data used  
in the  
study  
discussion

Fig 5SM: Sample S5 image before and

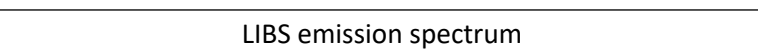

after LIBS data acquisition (see red dotted rectangle). LIBS emission spectrum (right and upper part) and XRF fluorescence spectrum (right and below part). Both data were recorded in the same surface region.

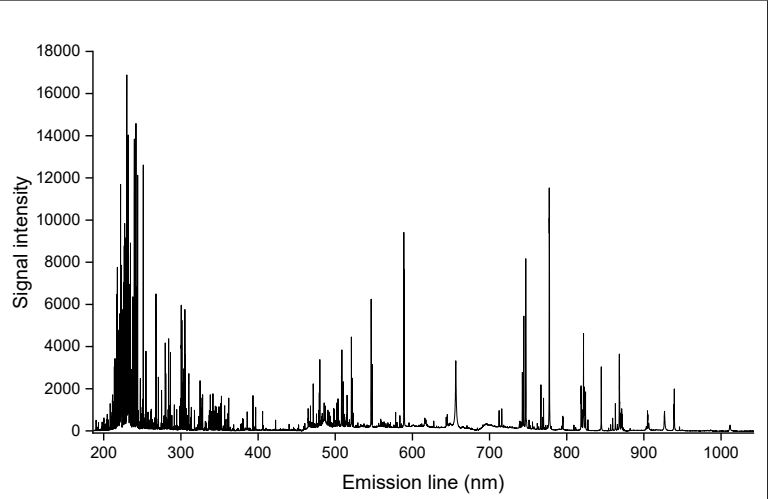

Before LIBS data acquisition

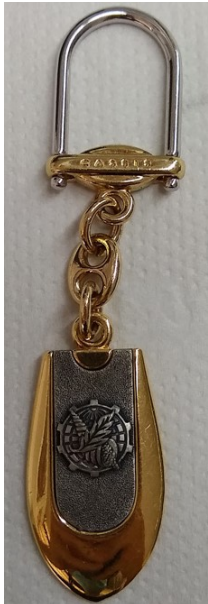

After LIBS data acquisition

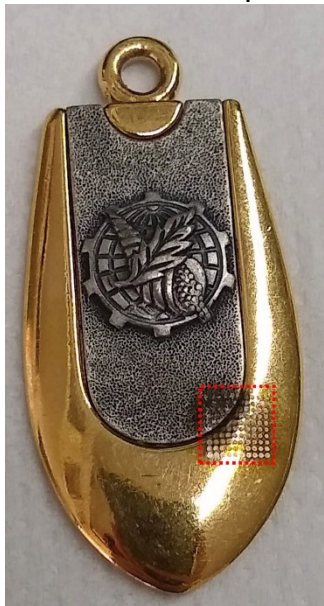

XRF spectrum

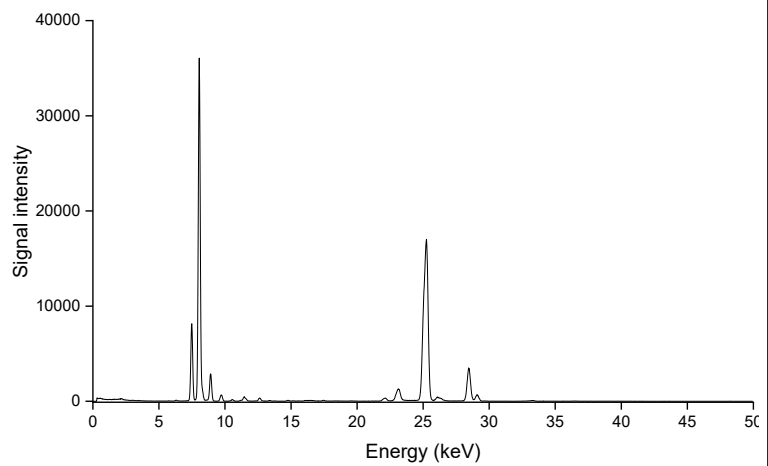

Fig 6SM: Sample S6 image before and

LIBS emission spectrum

after LIBS data acquisition (see red dotted rectangle). LIBS emission spectrum (right and upper part) and XRF fluorescence spectrum (right and below part). Both data were recorded in the same surface region.

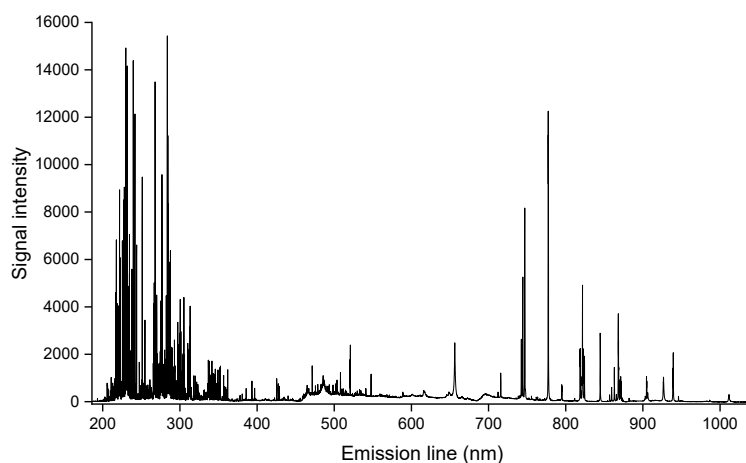

Before LIBS data acquisition

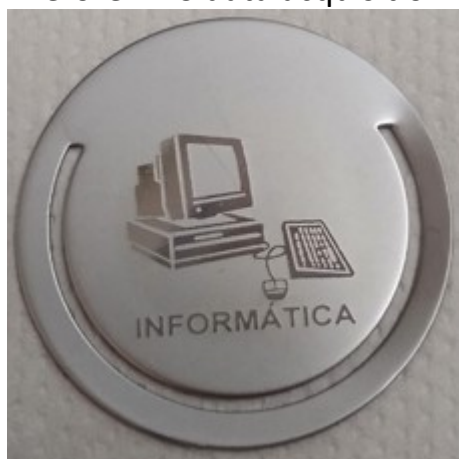

After LIBS data acquisition

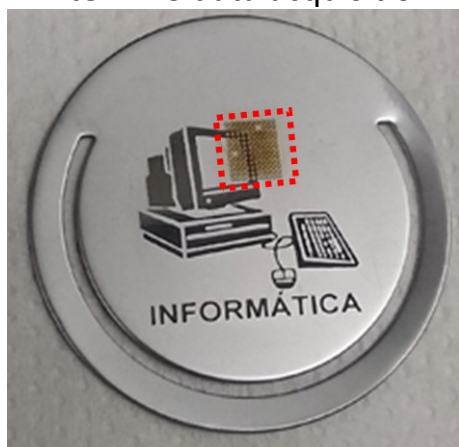

XRF spectrum

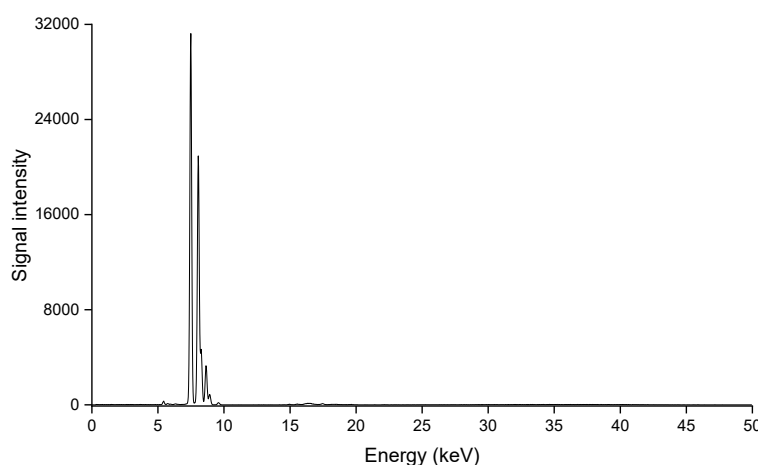

Fig 7SM: Sample S7 image before and after LIBS data acquisition (see red dotted rectangle). LIBS emission spectrum (right and upper part) and XRF fluorescence spectrum (right and below part). Both data were recorded in the same surface region.

LIBS emission spectrum

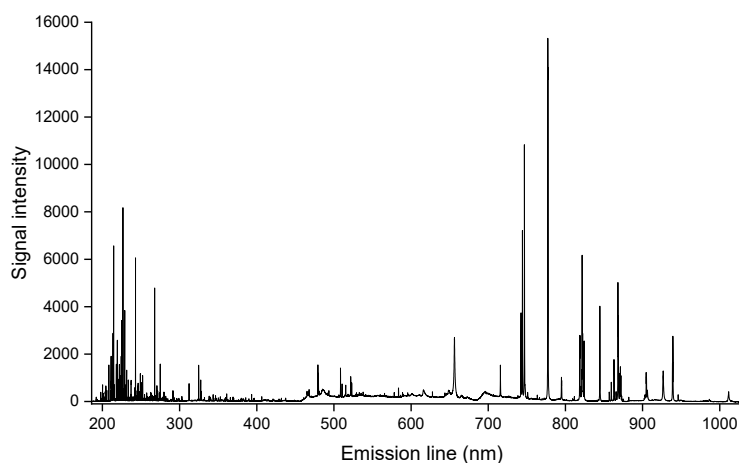

Before LIBS data acquisition

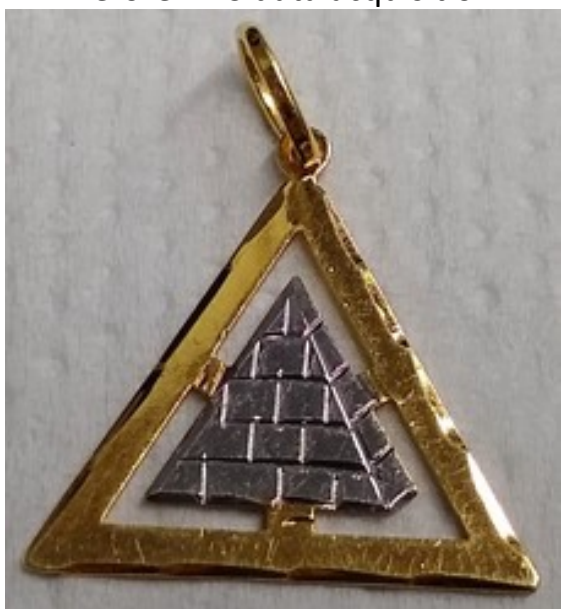

After LIBS data acquisition

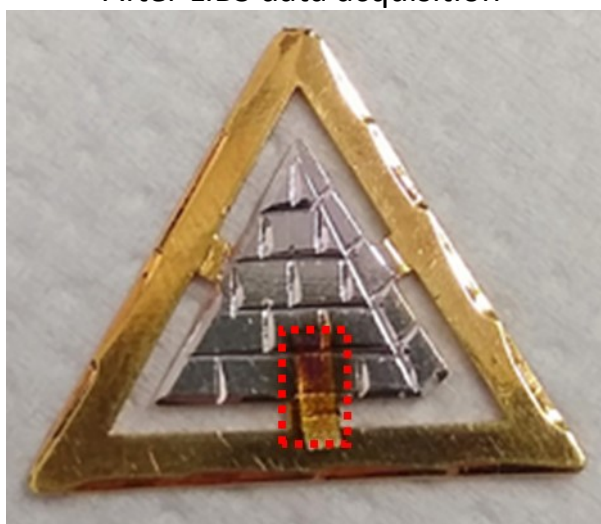

XRF spectrum

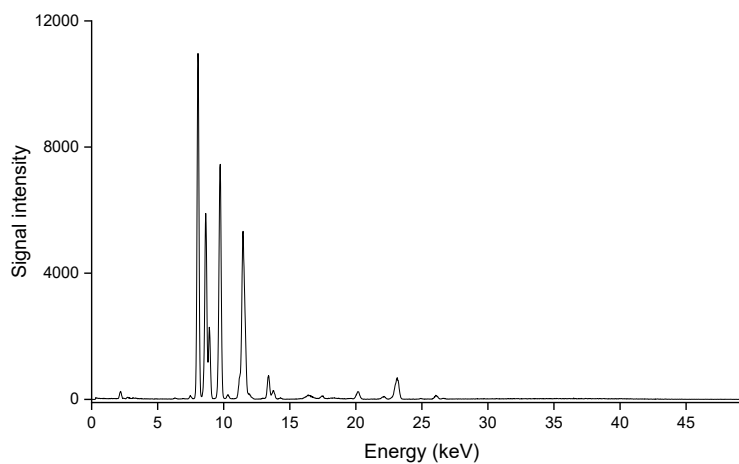

Fig 8SM: Sample S8 image before and after LIBS data acquisition (see red dotted retangule). LIBS emission spectrum (right and upper part) and XRF fluorescence spectrum (right and below part). Both data were recorded in the same surface region.

LIBS emission spectrum

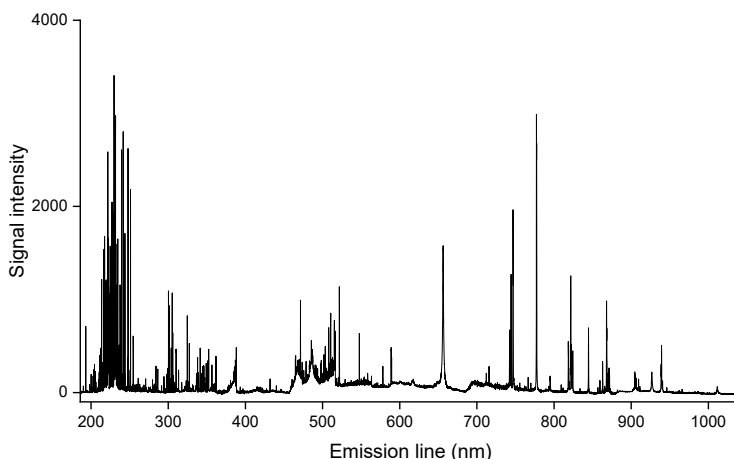

Before LIBS data acquisition

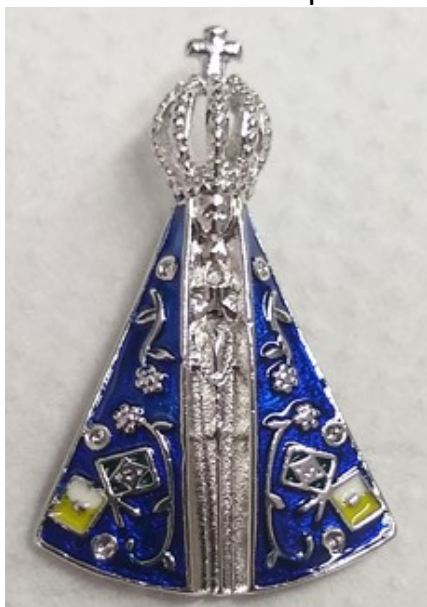

After LIBS data acquisition (The sample was analyzed twice using LIBS, to optimize the region of the data acquisition.)

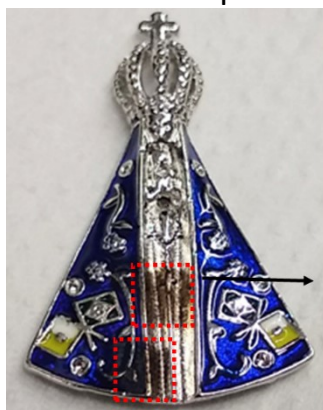

Data used  
in the  
study  
discussion

XRF spectrum

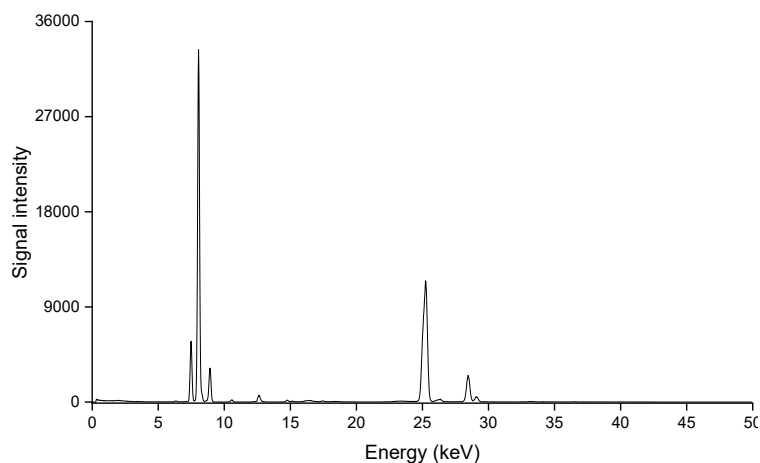

Fig 9SM: Sample S9 image before and

LIBS emission spectrum

after LIBS data acquisition (see red dotted rectangle). LIBS emission spectrum (right and upper part) and XRF fluorescence spectrum (right and below part). Both data were recorded in the same surface region.

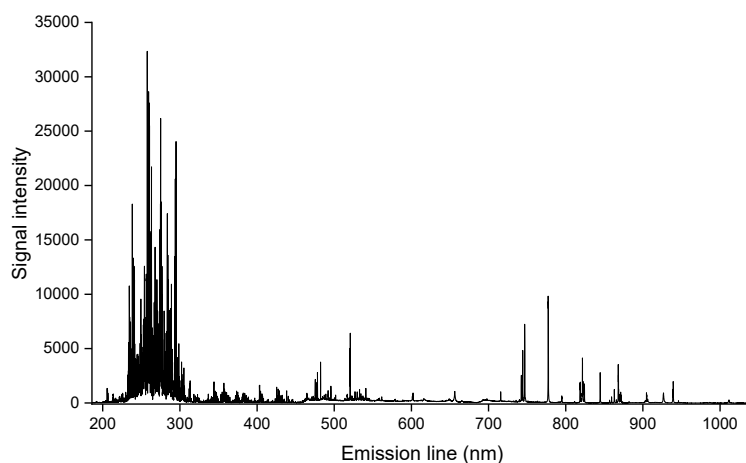

Before LIBS data acquisition

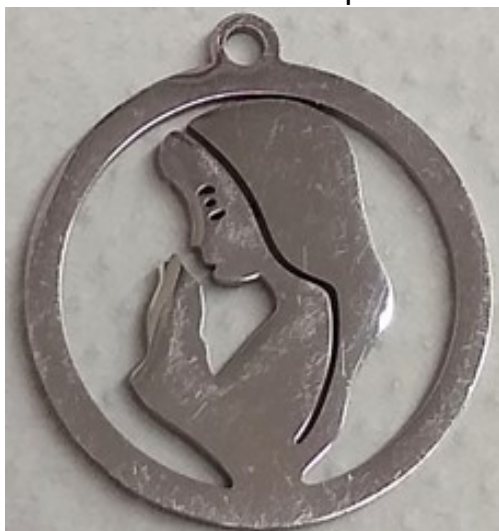

After LIBS data acquisition

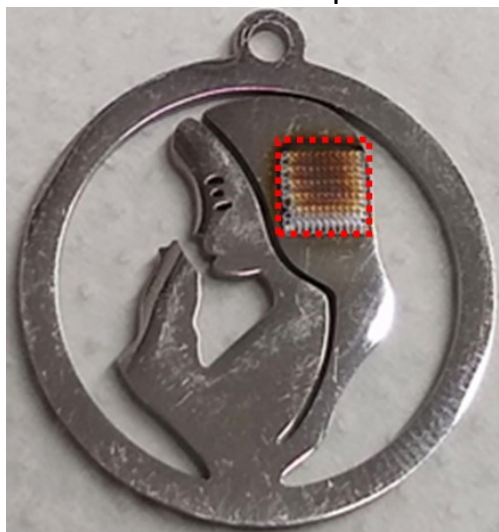

XRF spectrum

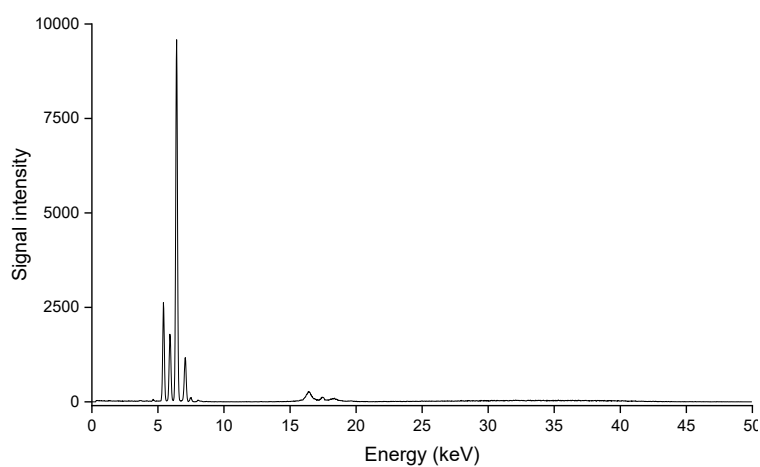

Fig 10SM: Sample S10 image before and after LIBS data acquisition (see red dotted rectangle). LIBS emission spectrum (right and upper part) and XRF fluorescence spectrum (right and below part). Both data were recorded in the same surface region.

LIBS emission spectrum

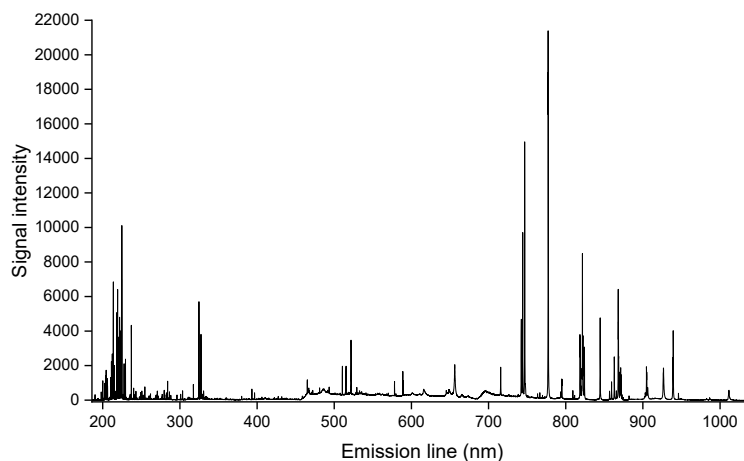

Before LIBS data acquisition

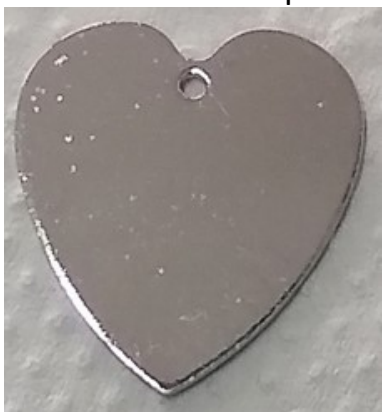

After LIBS data acquisition (The sample was analyzed twice using LIBS, to optimize the region of the data acquisition.)

Data used in the study discussion

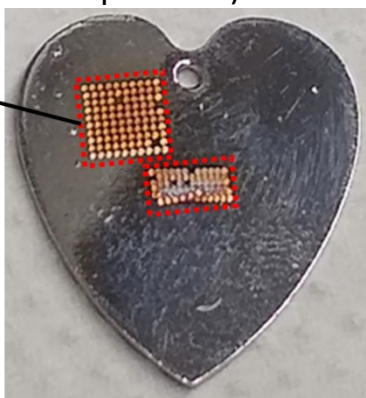

XRF spectrum

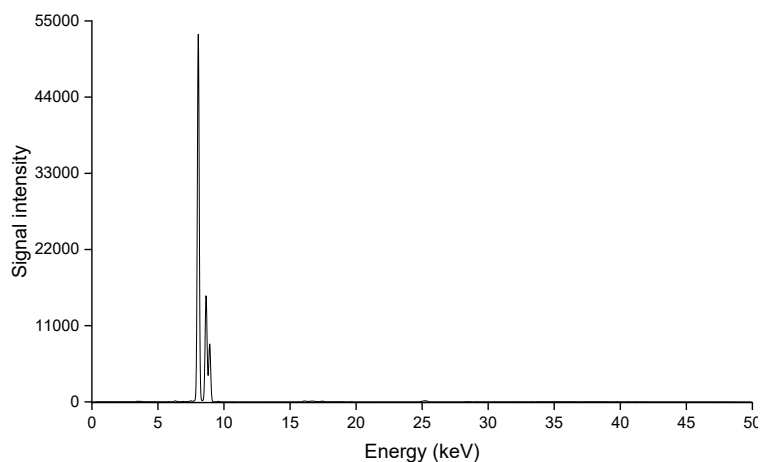

Fig 11SM: Sample S11 image before and after LIBS data acquisition (see red dotted rectangle). LIBS emission spectrum (right and upper part) and XRF fluorescence spectrum (right and below part). Both data were recorded in the same surface region.

LIBS emission spectrum

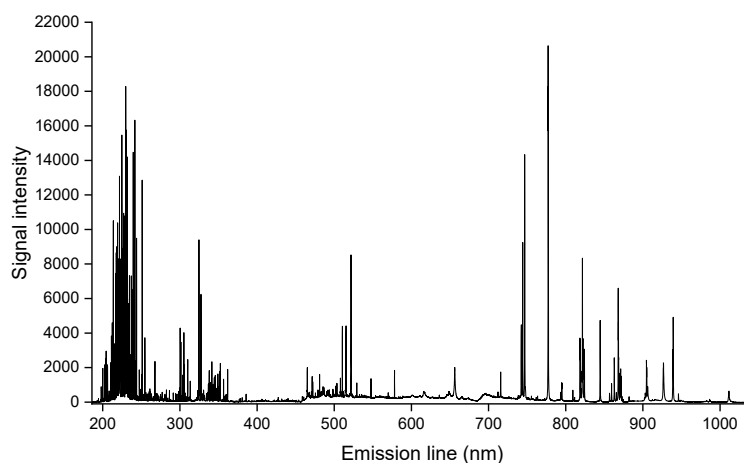

Before LIBS data acquisition

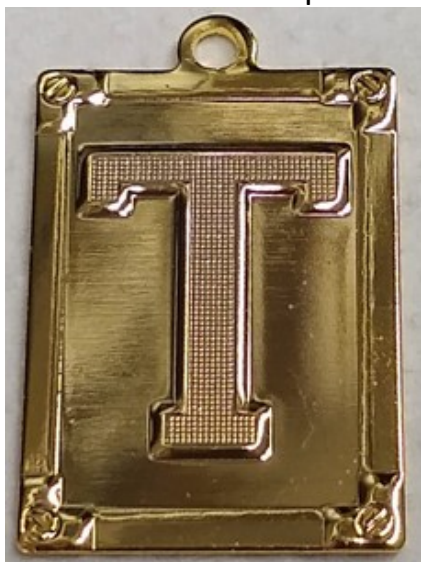

After LIBS data acquisition

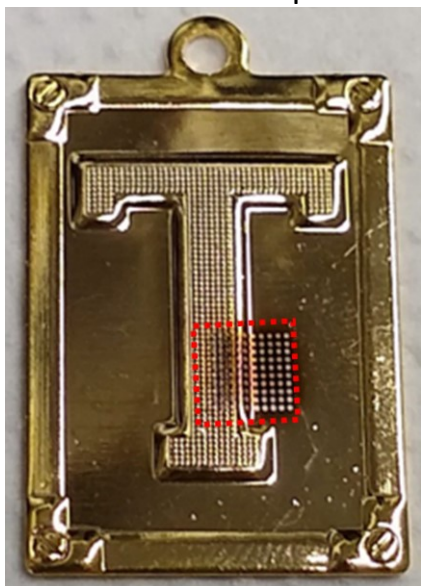

XRF spectrum

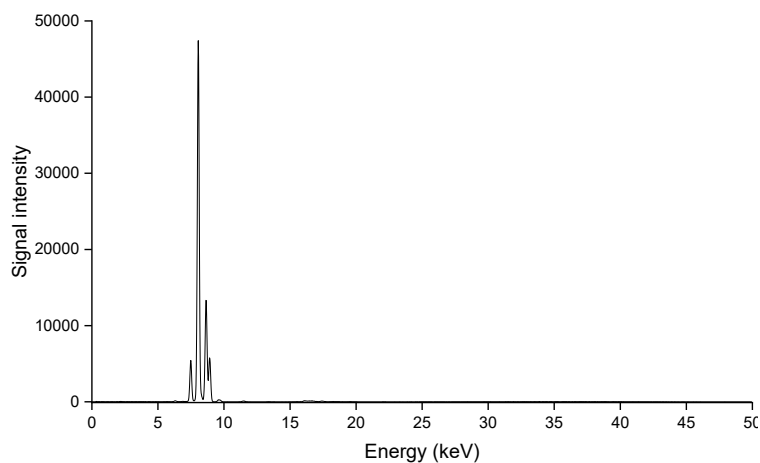

Fig 12SM: Sample S12 image before and after LIBS data acquisition (see red dotted rectangle). LIBS emission spectrum (right and upper part) and XRF fluorescence spectrum (right and below part). Both data were recorded in the same surface region.

LIBS emission spectrum

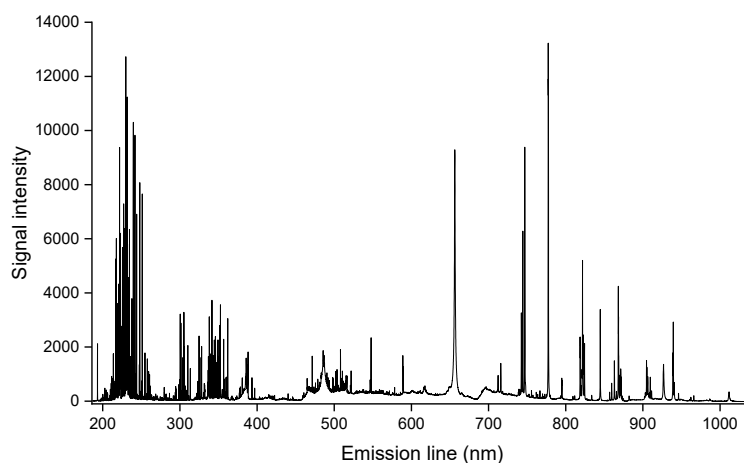

Before LIBS data acquisition

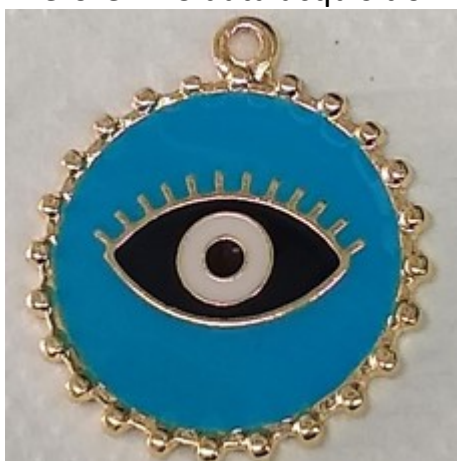

After LIBS data acquisition

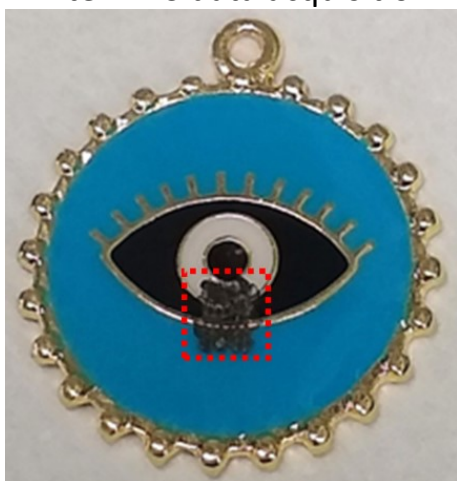

XRF spectrum

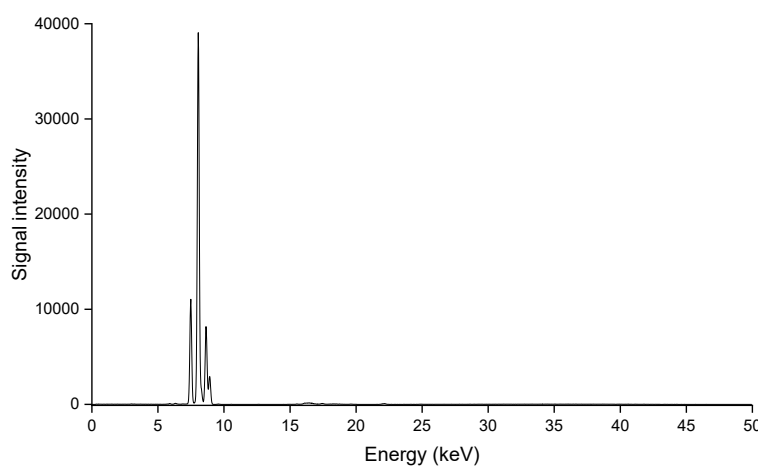

Fig 13SM: Sample S13 image before and after LIBS data acquisition (see red dotted rectangle). LIBS emission spectrum (right and upper part) and XRF fluorescence spectrum (right and below part). Both data were recorded in the same surface region.

LIBS emission spectrum

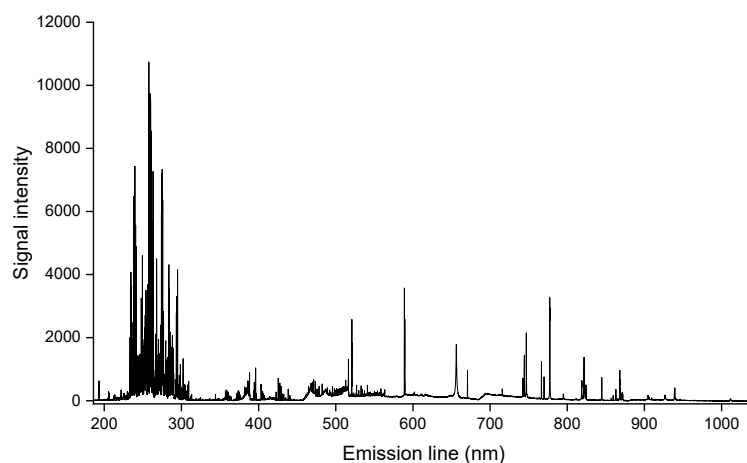

Before LIBS data acquisition

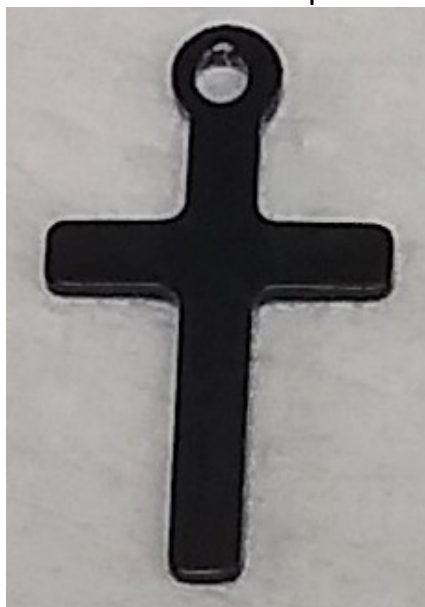

After LIBS data acquisition

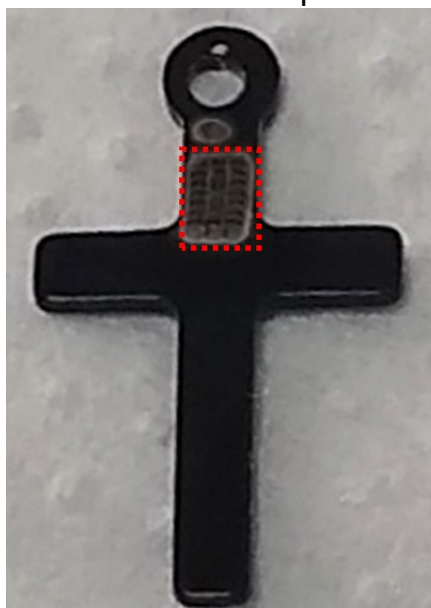

XRF spectrum

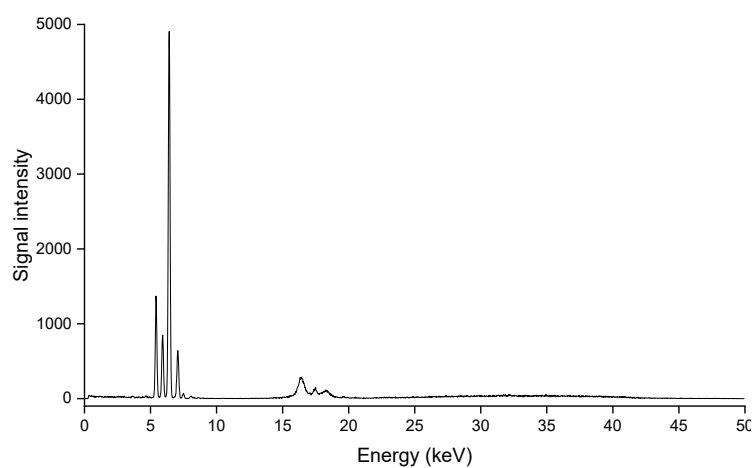

Fig 14SM: Sample S14 image before and after LIBS data acquisition (see red dotted rectangle). LIBS emission spectrum (right and upper part) and XRF fluorescence spectrum (right and below part). Both data were recorded in the same surface region.

LIBS emission spectrum

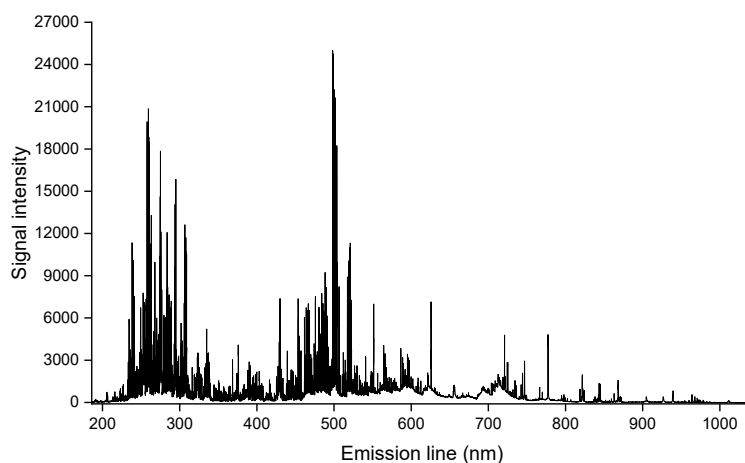

Before LIBS data acquisition

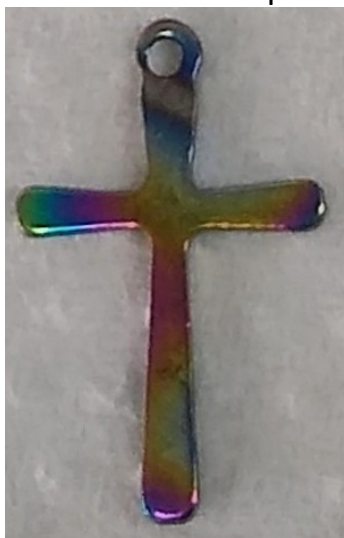

XRF spectrum

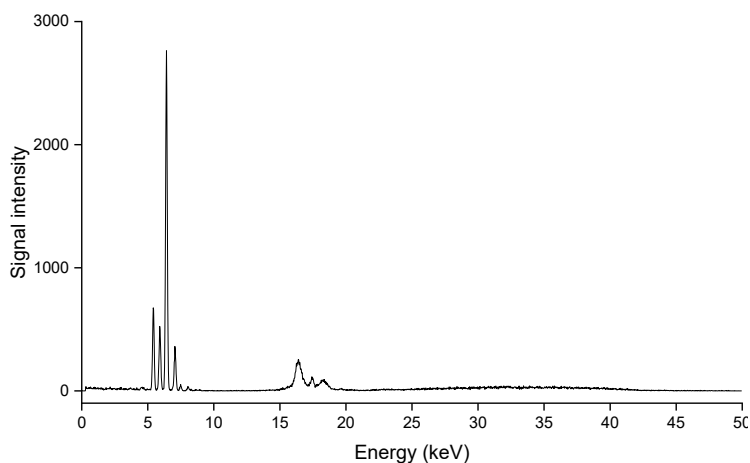

After LIBS data acquisition (The sample was analyzed twice using LIBS, to optimize the region of the data acquisition.)

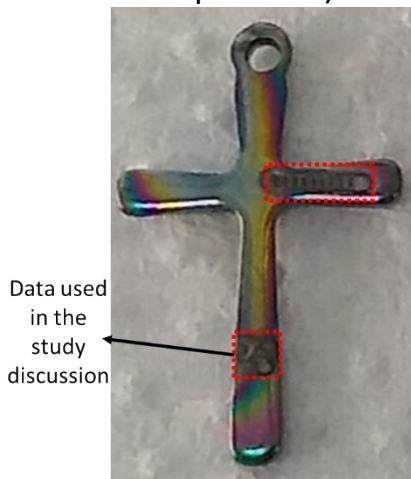

Fig 15SM: Sample S15 image before

LIBS emission spectrum

and after LIBS data acquisition (see red dotted rectangle). LIBS emission spectrum (right and upper part) and XRF fluorescence spectrum (right and below part). Both data were recorded in the same surface region.

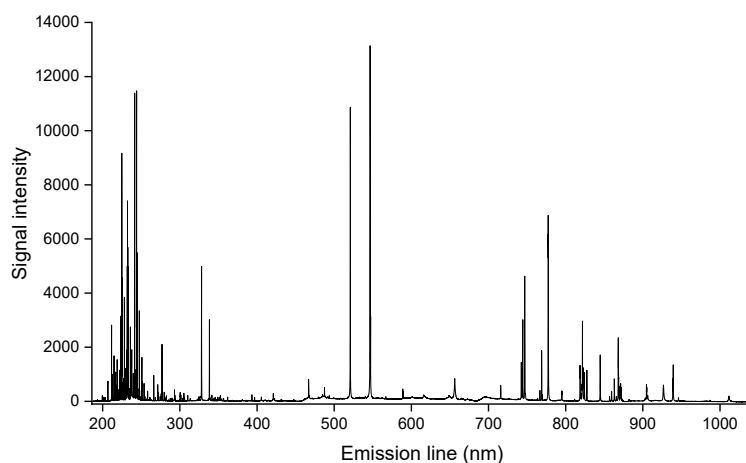

Before LIBS data acquisition

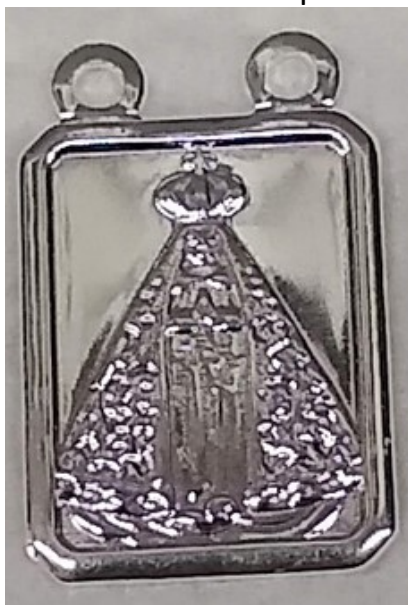

After LIBS data acquisition

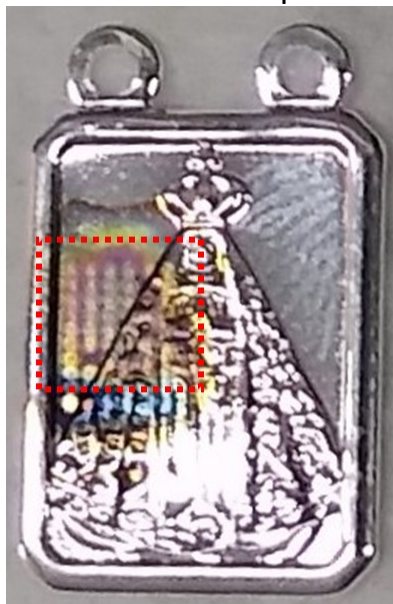

XRF spectrum

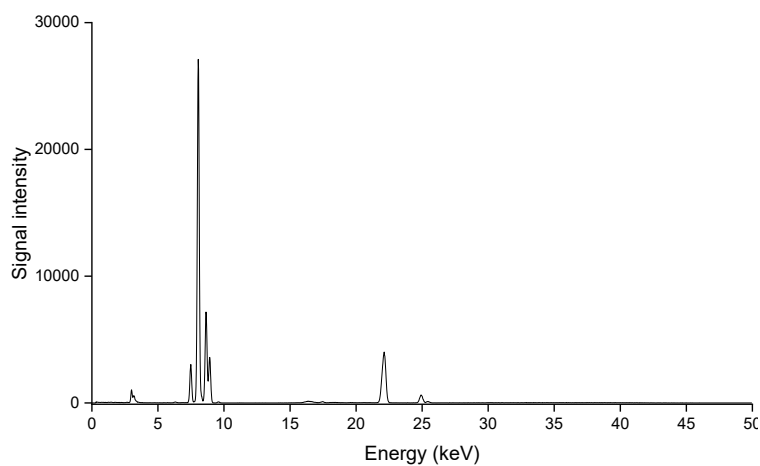

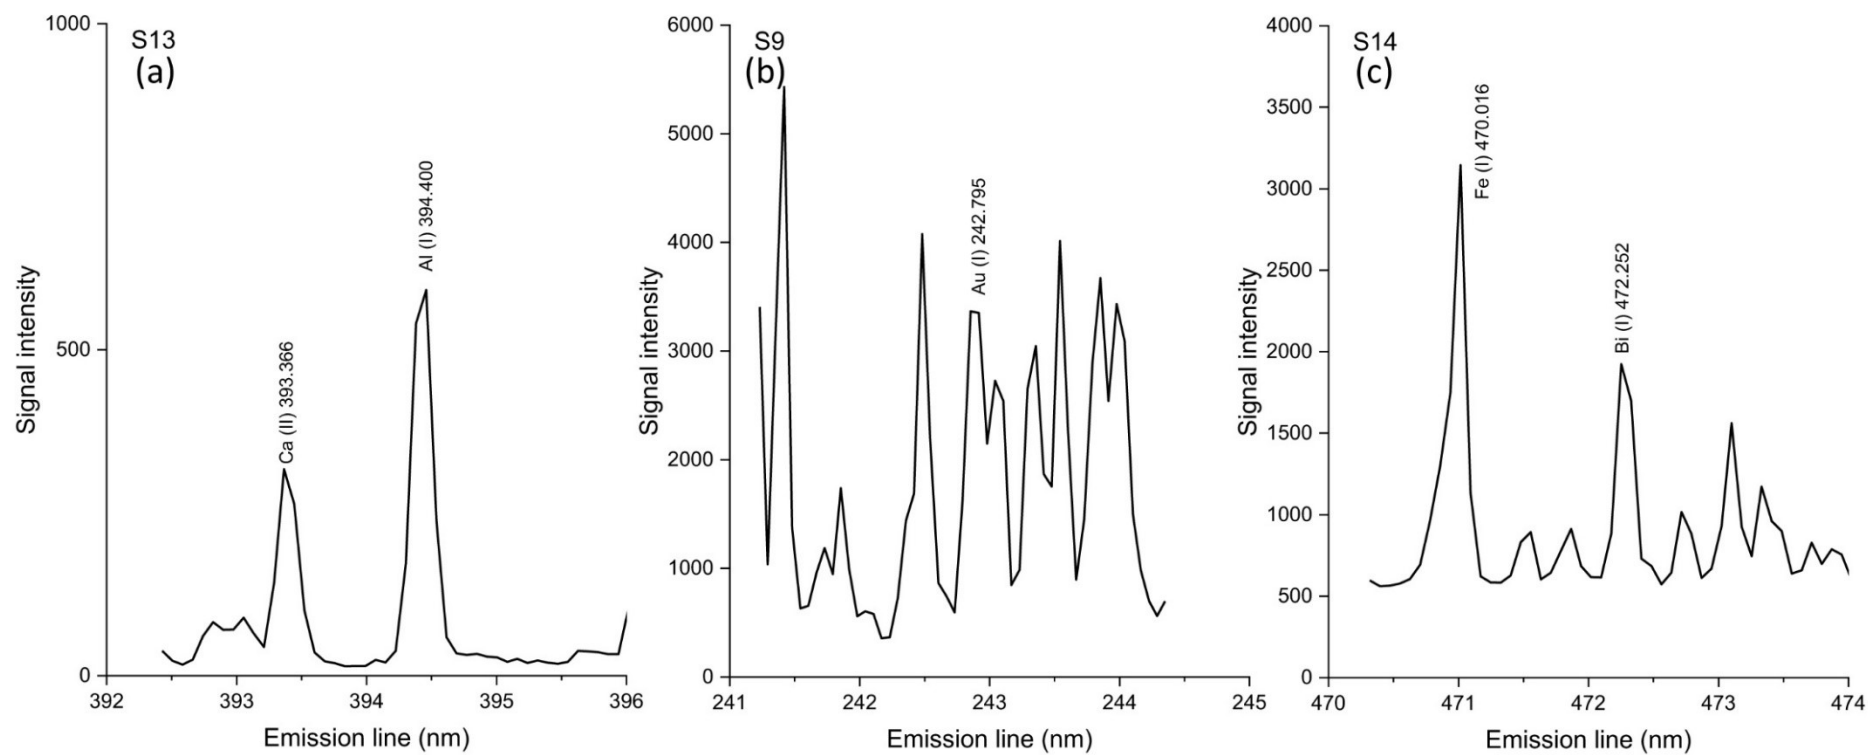

Fig 16SM. Observed emission lines (nm) from the LIBS recorded spectra for samples S13 (a), S9 (b), and S14 (c), part 1.

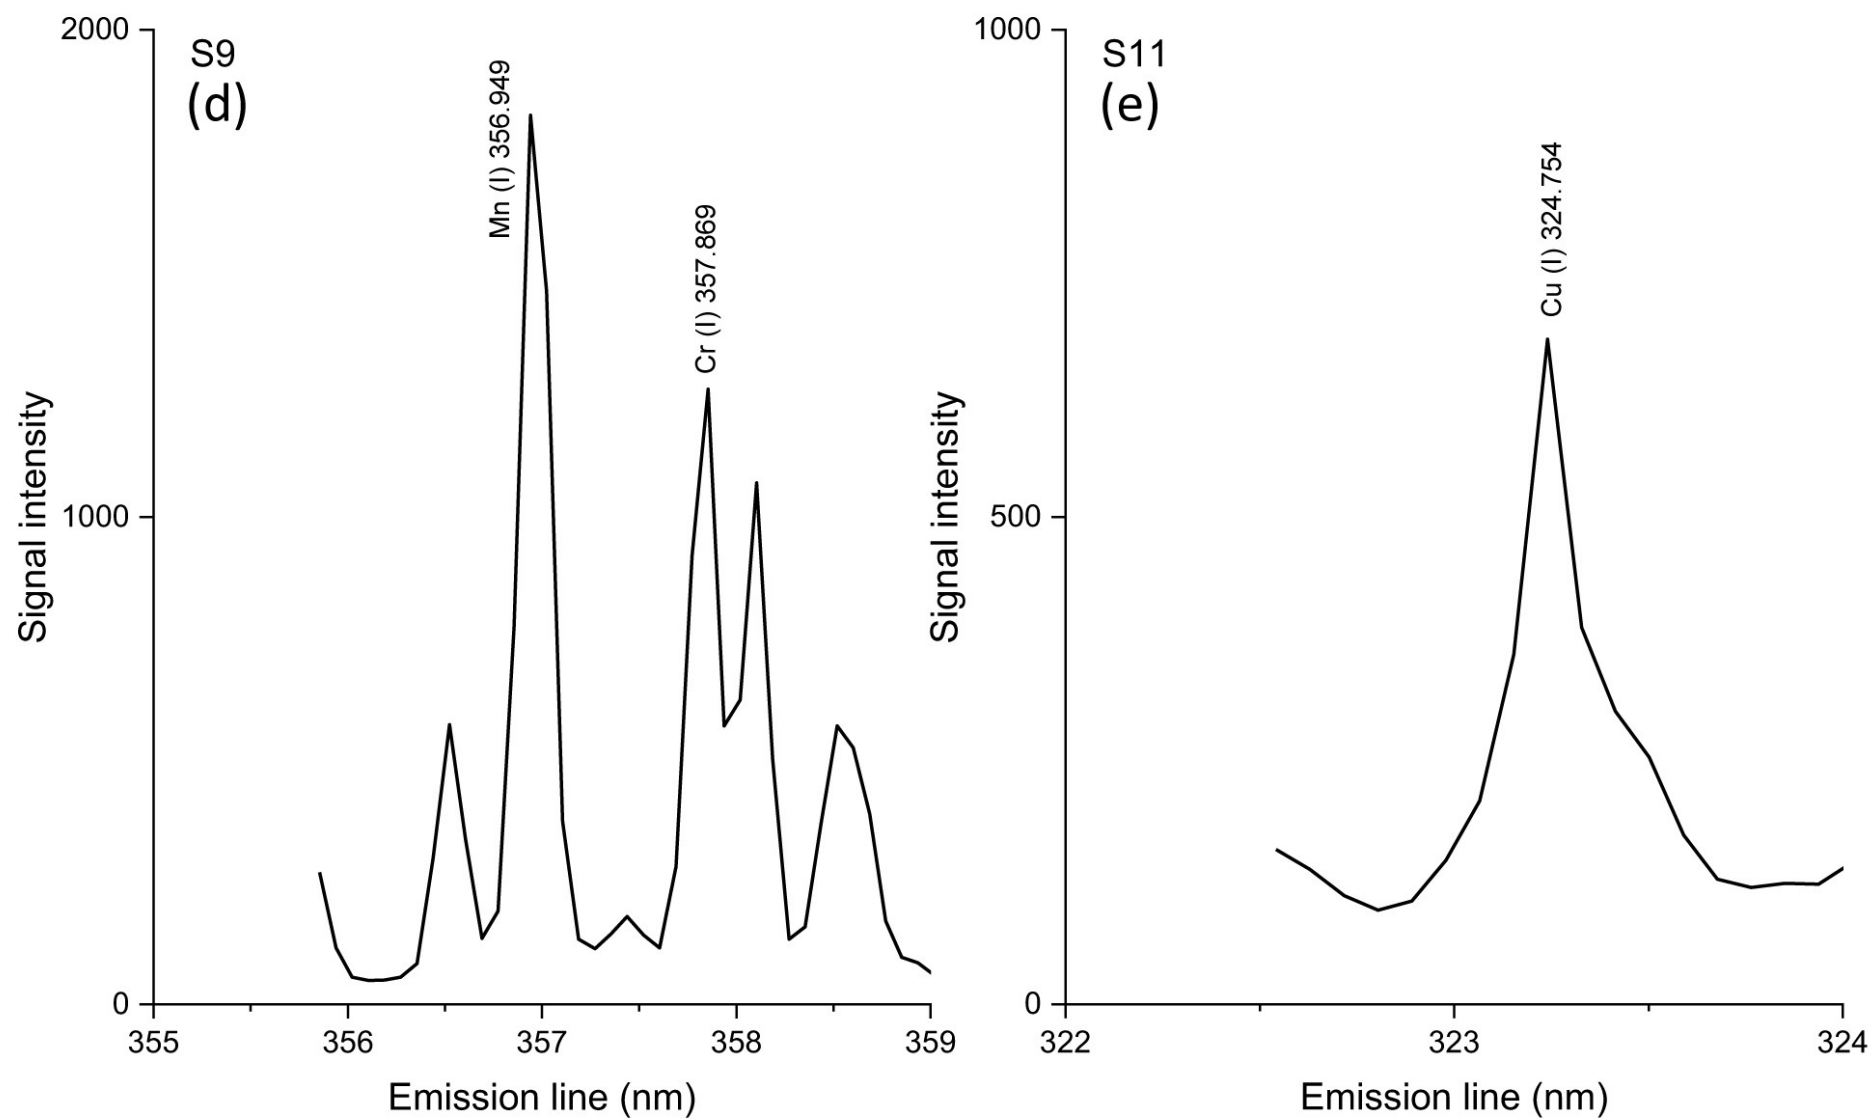

Fig 16SM. Observed emission lines (nm) from the LIBS recorded spectra for samples S9 (d) and S11 (e), part 2.

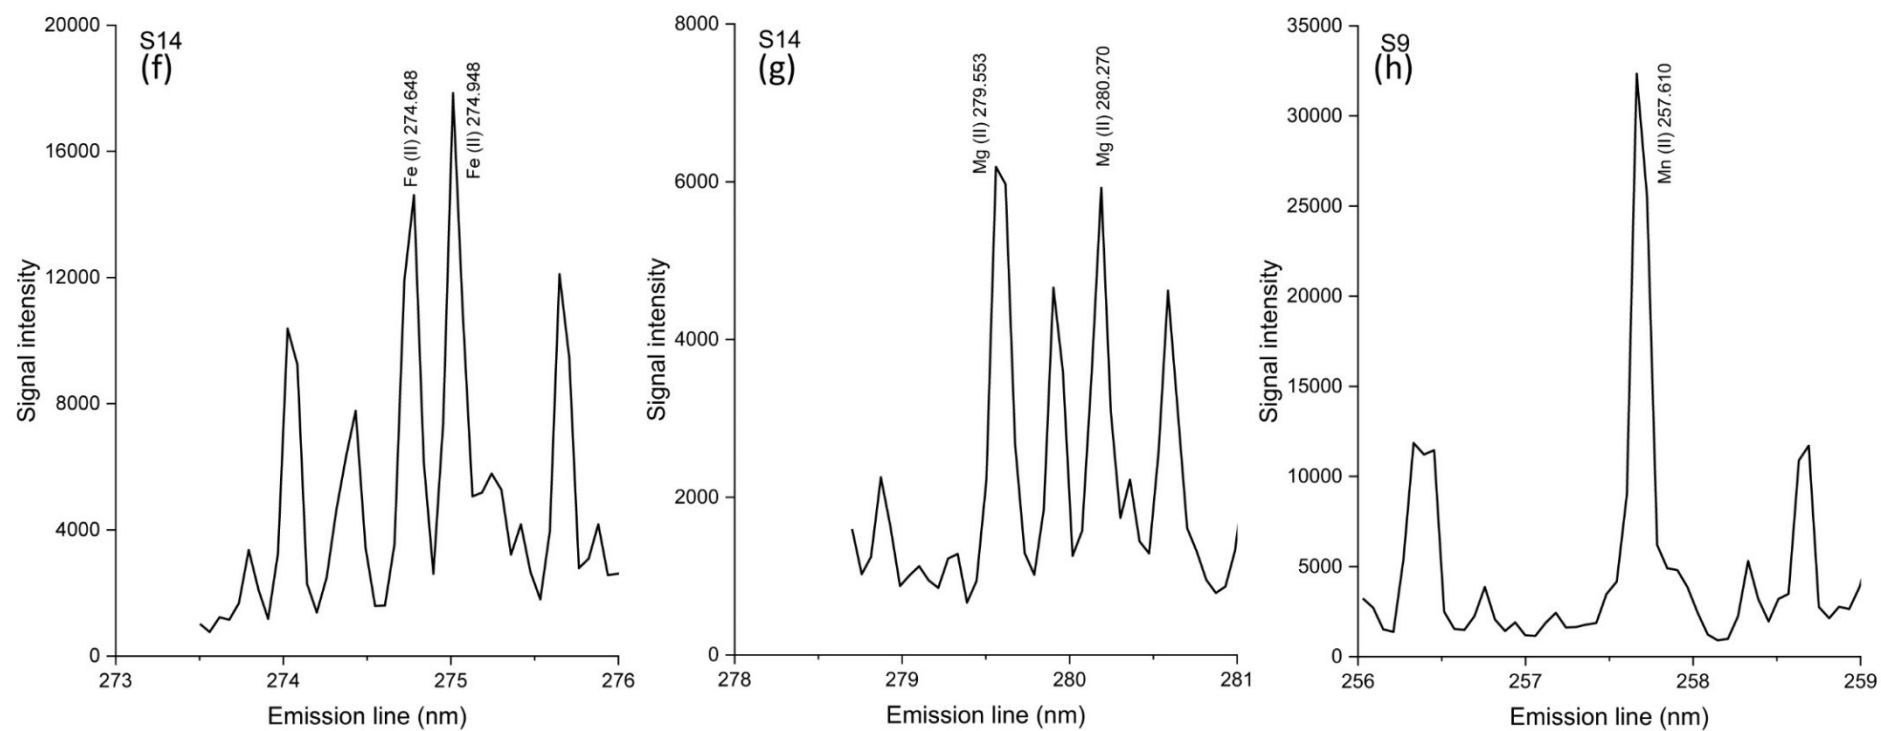

Fig 16SM. Observed emission lines (nm) from the LIBS recorded spectra for samples S14 (f and g), and S9 (h), part 3.

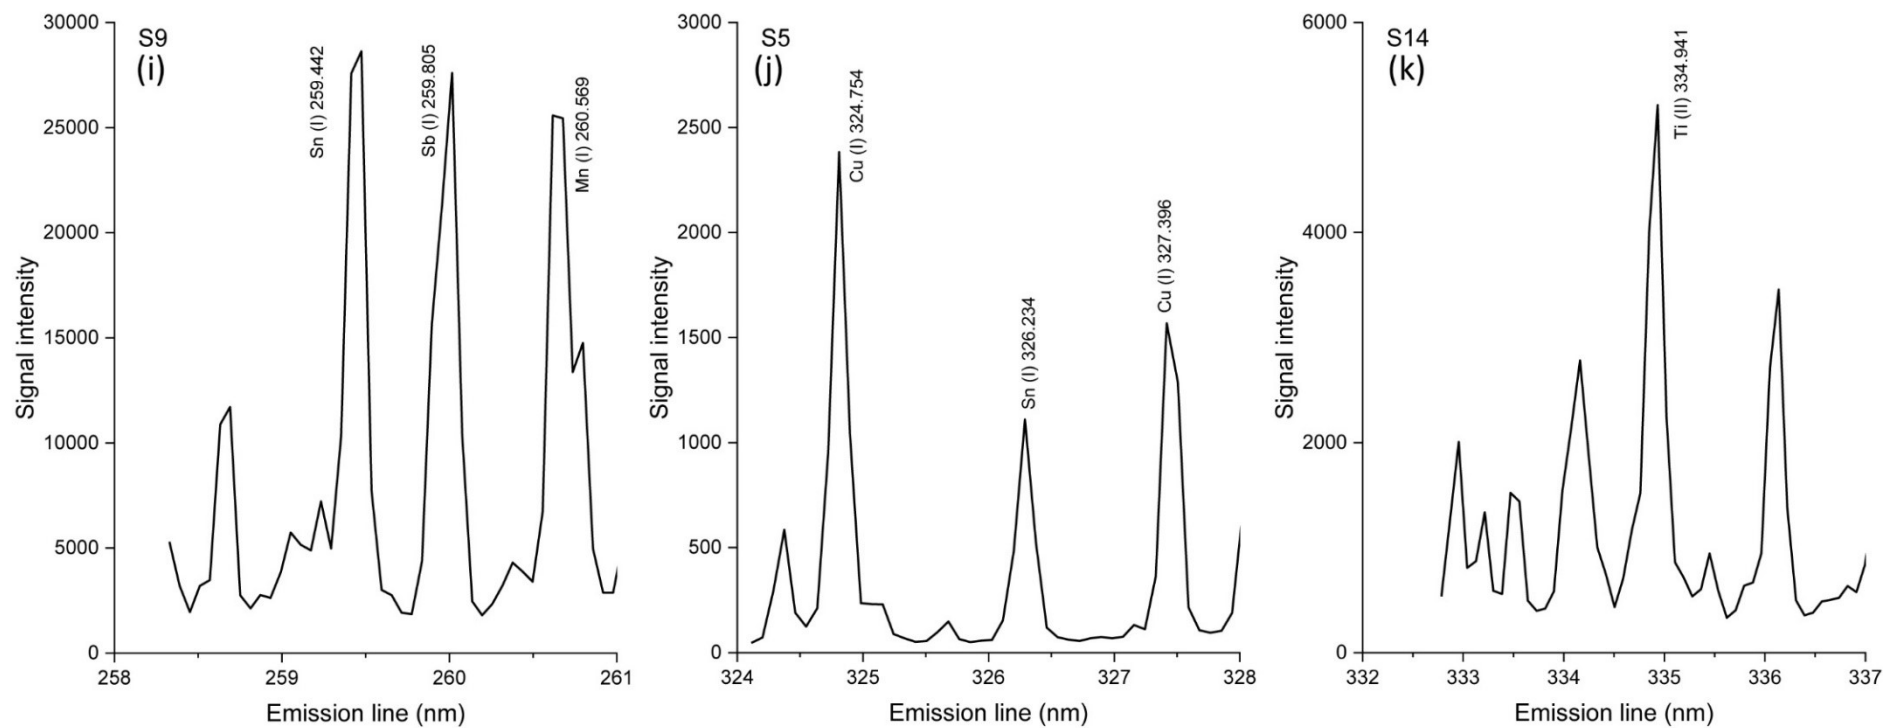

Fig 16SM. Observed emission lines (nm) from the LIBS recorded spectra for samples S9 (i), S5 (j), and S14 (k), part 4.

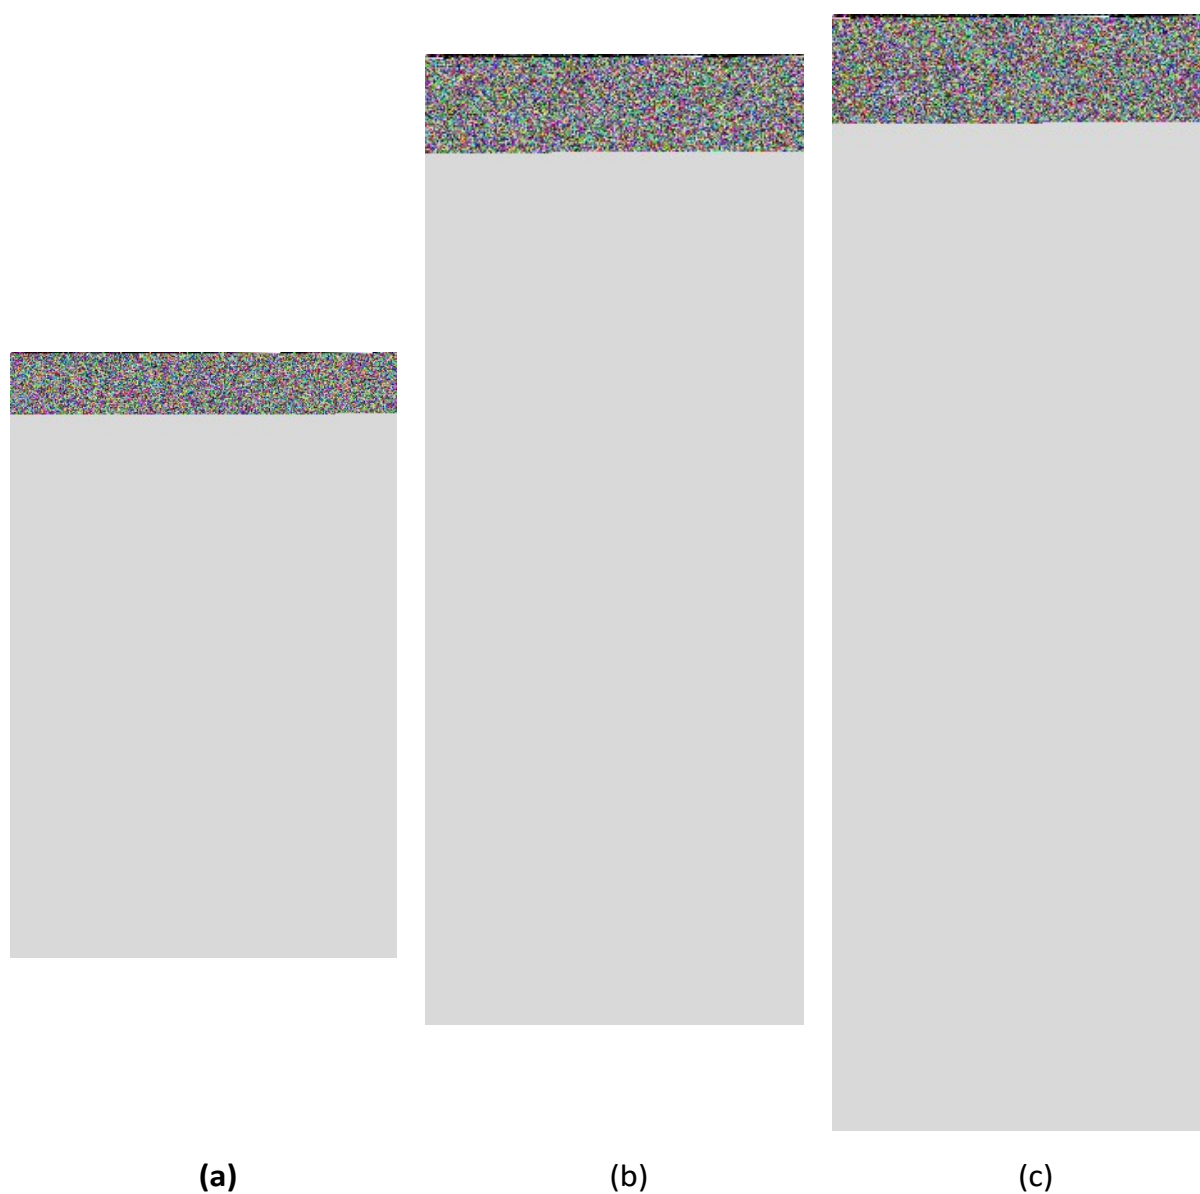

Fig 1. Representative samples (S) that were acquired at local stores during the experimental part: earrings (a: S1), and keychains (b: S3, and c: S5).

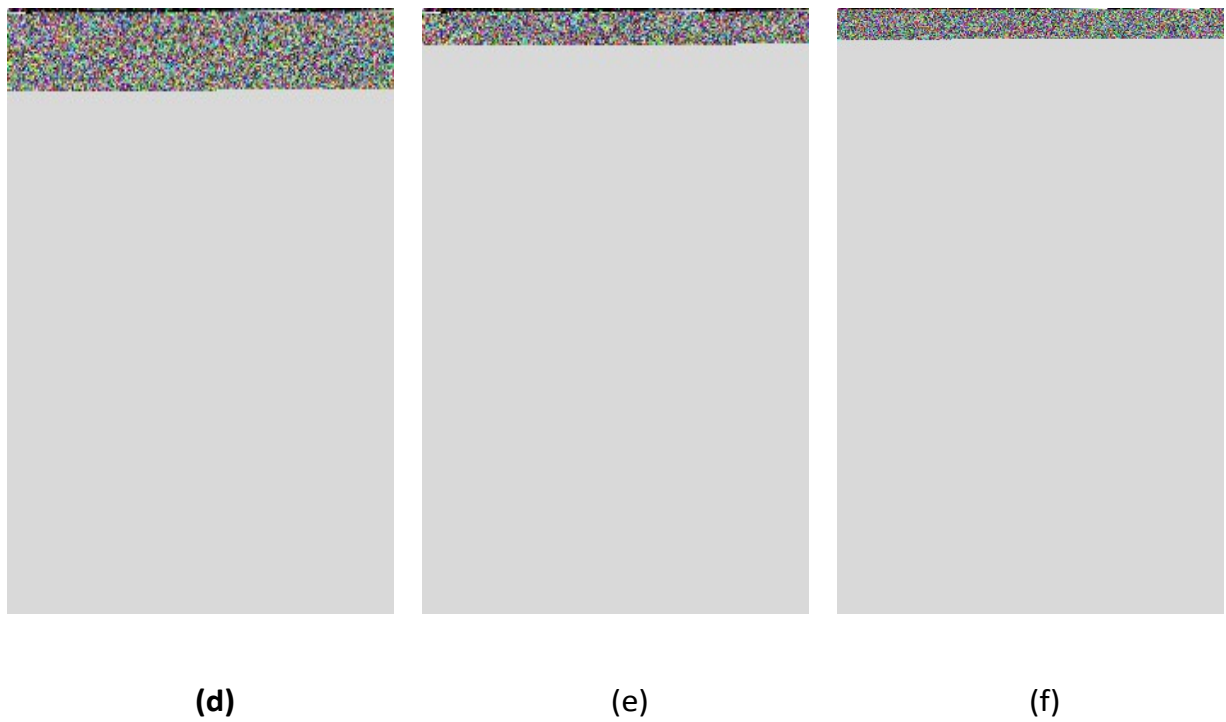

Fig 1. Representative samples (S) that were acquired at local stores during the experimental part: necklace pendants (d: S11, e: S13, and f: S14).

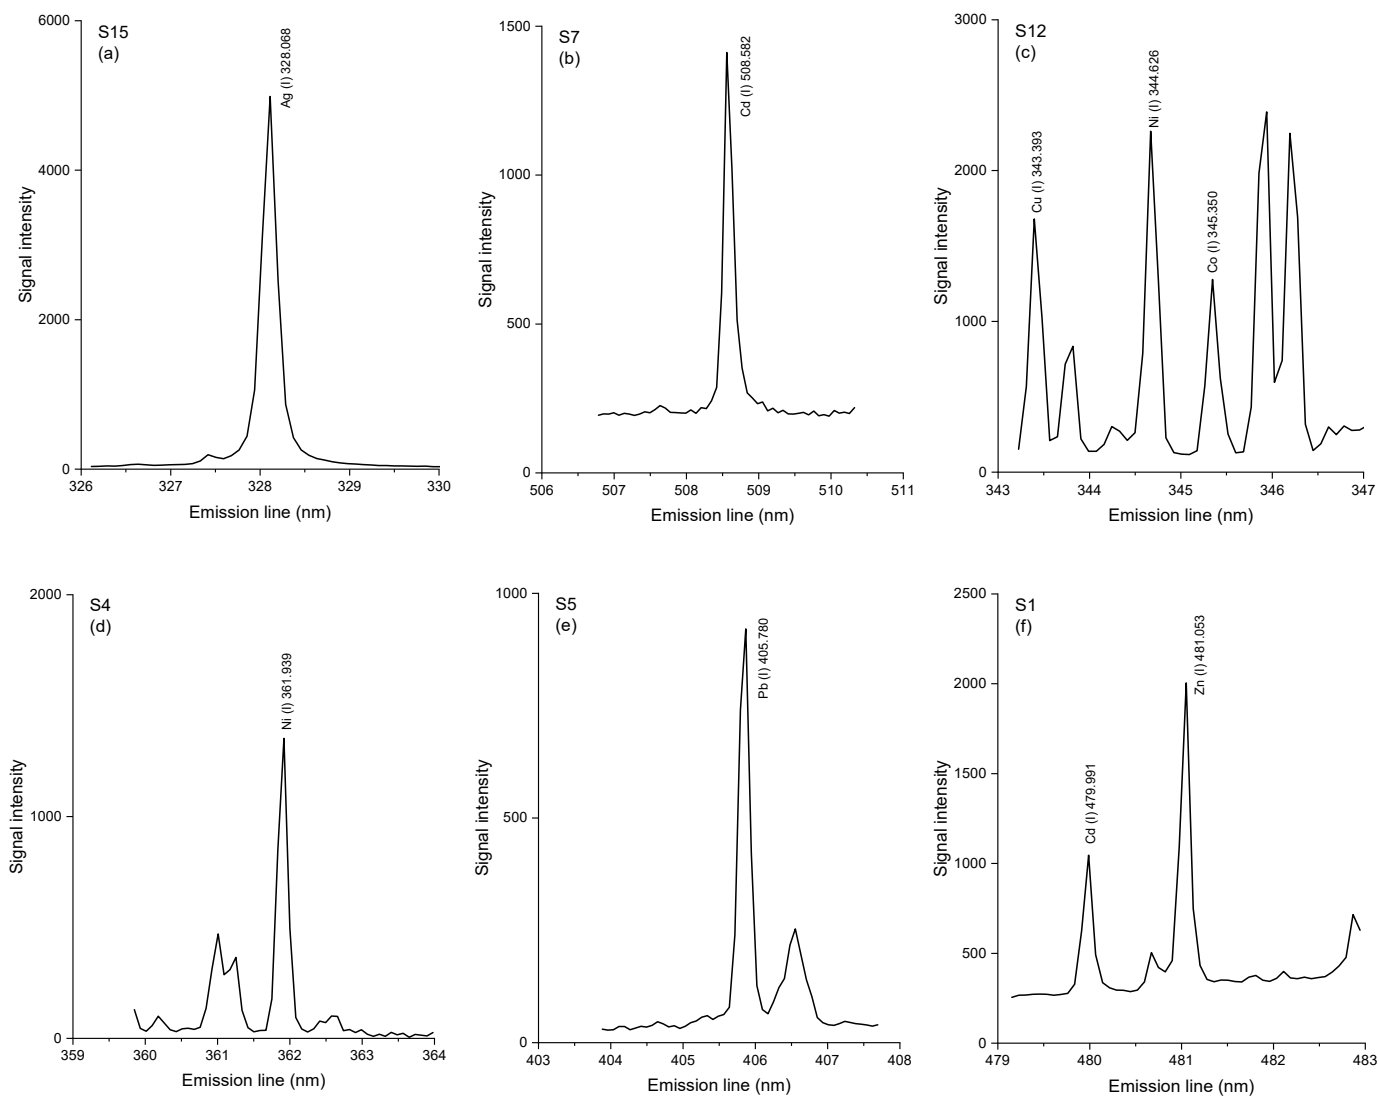

Fig 2. Observed emission lines (nm) from the LIBS recorded spectra for samples S15 (a), S7 (b), S12 (c), S4 (d), S5 (e), and S1 (f).

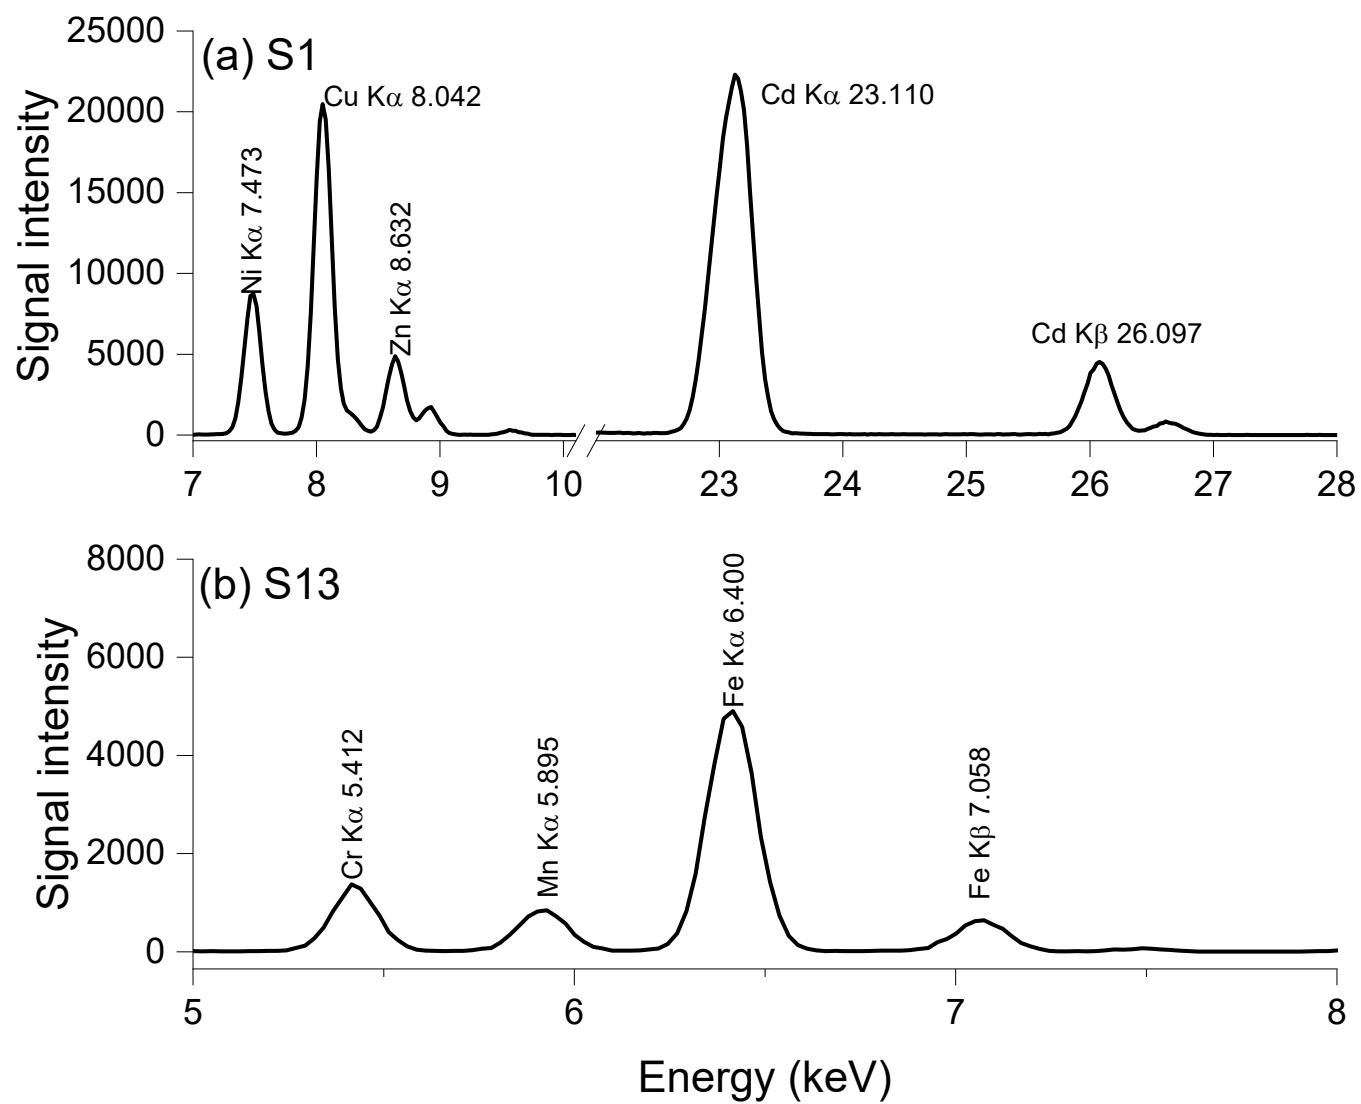

Fig 3. ED-XRF spectra fragments for two representative samples: S1 (a) and S13 (b).

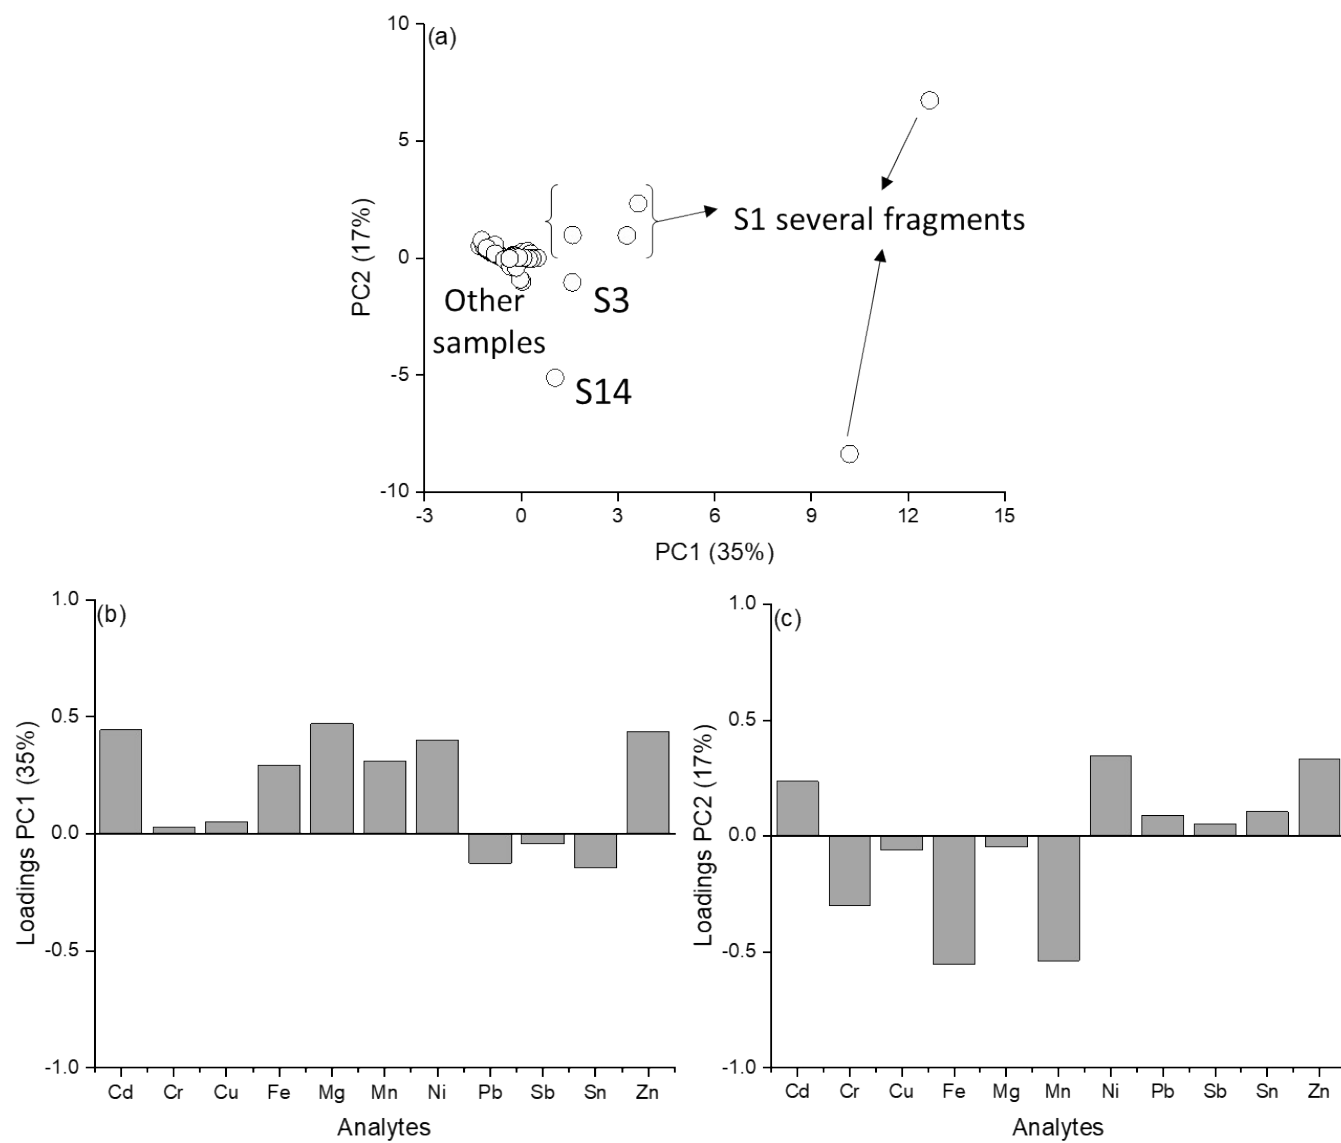

Fig 4. Score (a) and loading plots of PC1 (b) and PC2 (c).

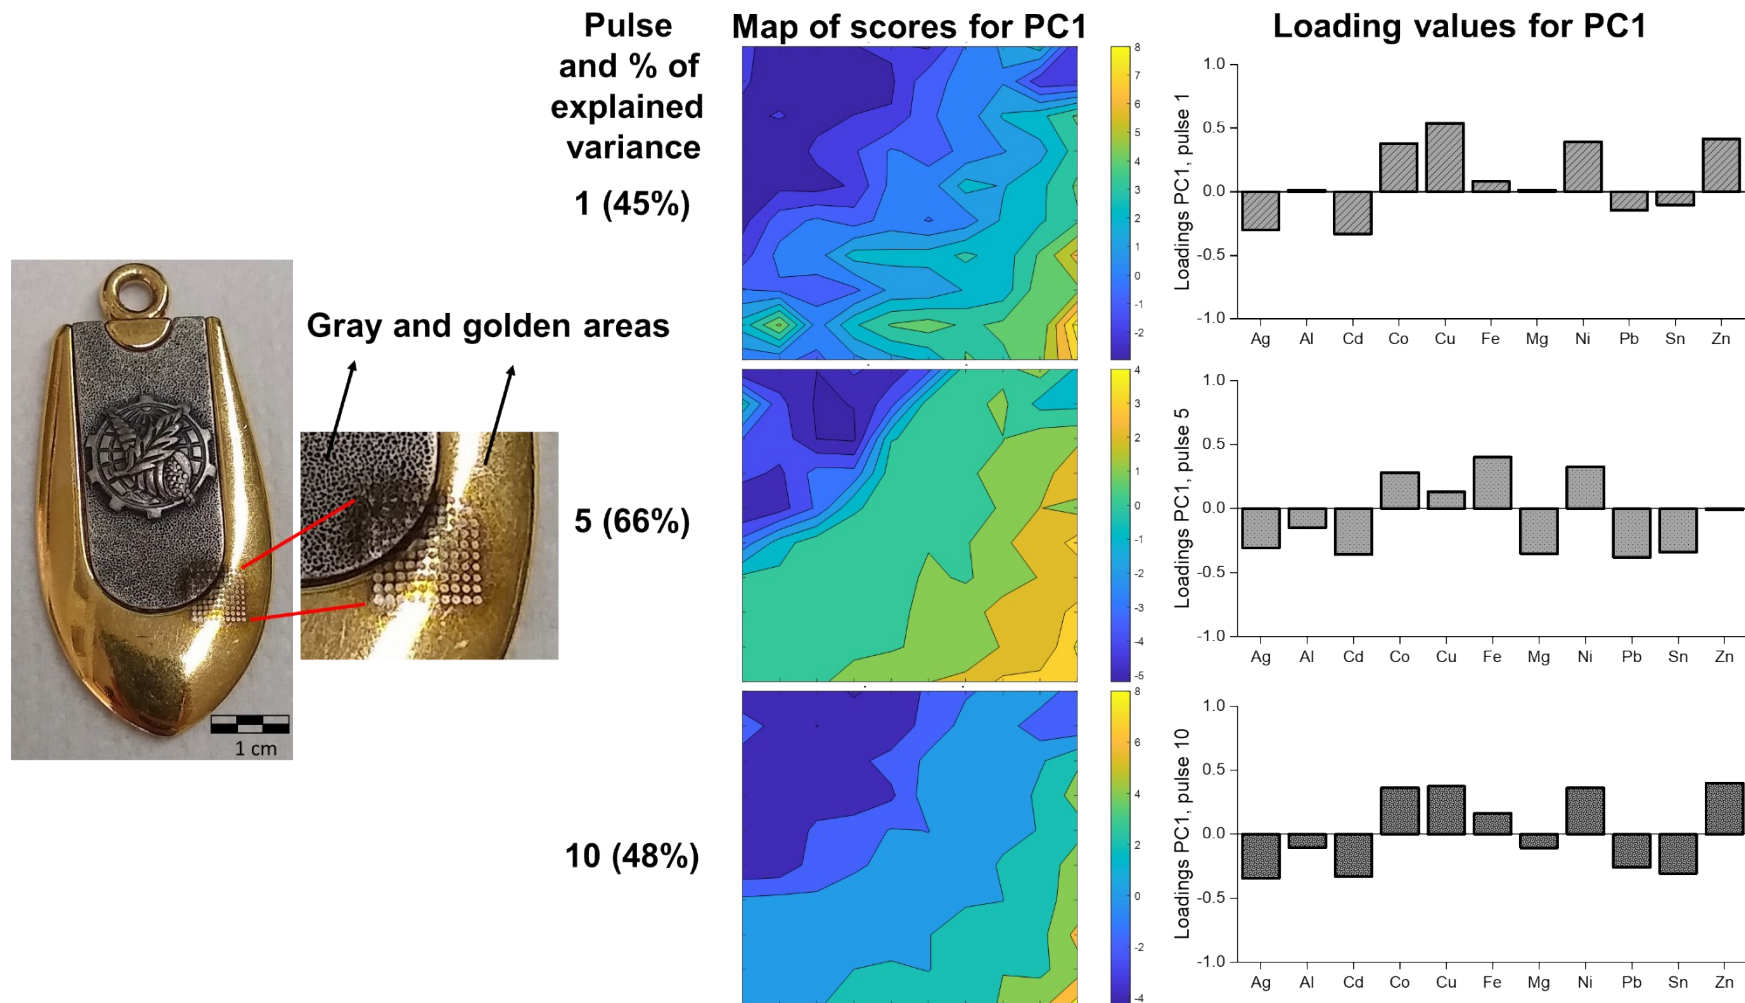

Fig 5. Scores maps and loadings are valued at PC1 for S5, considering pulses 1, 5, and 10.
